# Supplementary material for: Incidence, risk factors and consequences of preterm birth – findings from a multi-centric observational study for 14 months in Nepal
Source: PubMed Central journal article supplement (PMC7368758; doi:10.1186/s13690-020-00446-7), 2020-07-17
Supplement: 13690_2020_446_MOESM1_ESM.pdf [file 13690_2020_446_MOESM1_ESM.pdf]

## Form 1

## NePeriQIP Registry Data

|                |           |
|----------------|-----------|
| Data Collector | Name..... |
|                | Code..... |

| Data ID                               | Information                        | Write or circle where applicable                                                                                                                                                                                  | Notes |
|---------------------------------------|------------------------------------|-------------------------------------------------------------------------------------------------------------------------------------------------------------------------------------------------------------------|-------|
| <b>PART A: BACKGROUND INFORMATION</b> |                                    |                                                                                                                                                                                                                   |       |
| 101.                                  | Mother's first name                |                                                                                                                                                                                                                   |       |
| 102.                                  | Mothers' last name                 |                                                                                                                                                                                                                   |       |
| 103.                                  | Inpatient number                   |                                                                                                                                                                                                                   |       |
| 104.                                  | Age of mother<br>(completed years) | <input type="text"/> <input type="text"/>                                                                                                                                                                         |       |
| 105.                                  | Caste                              |                                                                                                                                                                                                                   |       |
| 106.                                  | Ethnicity code                     |                                                                                                                                                                                                                   |       |
| 107.                                  | Address                            | District                                                                                                                                                                                                          |       |
|                                       |                                    | Municipality                                                                                                                                                                                                      |       |
|                                       |                                    | Ward                                                                                                                                                                                                              |       |
| 108.                                  | Mobile                             | <input type="text"/> |       |
| 109.                                  | Parity                             | Nullipara (never carried a pregnancy >22 wks)..... 1                                                                                                                                                              |       |
|                                       |                                    | Primipara (1 birth).....2                                                                                                                                                                                         |       |
|                                       |                                    | Multipara (2-5 births).....3                                                                                                                                                                                      |       |
|                                       |                                    | Grand multipara (>5 births).....4                                                                                                                                                                                 |       |

|                             | Date (BS) dd/mm/yyyy | Signature |
|-----------------------------|----------------------|-----------|
| Form completed:             |                      |           |
| Data entered into database: |                      |           |

**PART B: PRE-DELIVERY DETAILS**

**Part B1: Complications during pregnancy (based on ANC records)**

| 110.  | Complications recorded                              | Yes                                                                                                                          | No | NR |  |
|-------|-----------------------------------------------------|------------------------------------------------------------------------------------------------------------------------------|----|----|--|
| 110a. | Vaginal bleeding                                    | 1                                                                                                                            | 0  | 98 |  |
| 110b. | Premature rupture of membranes (PROM)               | 1                                                                                                                            | 0  | 98 |  |
| 110c. | Abdominal pain                                      | 1                                                                                                                            | 0  | 98 |  |
| 110d. | Decreased foetal movement                           | 1                                                                                                                            | 0  | 98 |  |
| 110e. | No foetal movement                                  | 1                                                                                                                            | 0  | 98 |  |
| 110f. | Muscle or joint pain                                | 1                                                                                                                            | 0  | 98 |  |
| 110g. | Lethargy                                            | 1                                                                                                                            | 0  | 98 |  |
| 110h. | Convulsion                                          | 1                                                                                                                            | 0  | 98 |  |
| 110i. | Coma/unconscious                                    | 1                                                                                                                            | 0  | 98 |  |
| 110j. | Disturbed vision                                    | 1                                                                                                                            | 0  | 98 |  |
| 110k. | Oedema                                              | 1                                                                                                                            | 0  | 98 |  |
| 110l. | Headache                                            | 1                                                                                                                            | 0  | 98 |  |
| 110m. | Hypertension during pregnancy ( $\geq 140/90$ mmHg) | 1                                                                                                                            | 0  | 98 |  |
| 110n. | Pre-existing hypertension                           | 1                                                                                                                            | 0  | 98 |  |
| 110o. | Glucose in urine                                    | 1                                                                                                                            | 0  | 98 |  |
| 110p. | Protein in urine                                    | 1                                                                                                                            | 0  | 98 |  |
| 110q. | Severe anaemia (Hb $< 7$ mg/dL)                     | 1                                                                                                                            | 0  | 98 |  |
| 110r. | Frequent micturation                                | 1                                                                                                                            | 0  | 98 |  |
| 110s. | Others (specify)                                    |                                                                                                                              |    |    |  |
| 111.  | Place making referral                               |                                                                                                                              |    |    |  |
| 112.  | Recent FHS recorded                                 | Yes, normal (110-160 BPM).....1<br>Yes, abnormal ( $< 110$ BPM or $> 160$ BPM)..... 2<br>Absent.....3<br>Not recorded.....98 |    |    |  |

| Part B2: Condition at the time of admission                                      |                                                                                                     |                         |                                                                                                                                                                 |    |    |  |
|----------------------------------------------------------------------------------|-----------------------------------------------------------------------------------------------------|-------------------------|-----------------------------------------------------------------------------------------------------------------------------------------------------------------|----|----|--|
| 113. Provisional diagnosis of any complication recorded at the time of admission |                                                                                                     |                         | Yes                                                                                                                                                             | No | NR |  |
| 113a.                                                                            | Antepartum haemorrhage (APH)<br>Abruptio placenta/ruptured uterus/placenta previa                   |                         | 1                                                                                                                                                               | 0  | 98 |  |
| 113b.                                                                            | Postpartum haemorrhage (PPH)<br>Atonic/tear/retained placenta/inverted uterus/ruptured uterus       |                         | 1                                                                                                                                                               | 0  | 98 |  |
| 113c.                                                                            | Prolonged labour (>12 hours active phase)                                                           |                         | 1                                                                                                                                                               | 0  | 98 |  |
| 113d.                                                                            | Hypertensive disorder (Chronic Hypertension/Pregnancy Induced Hypertension/Pre-Eclampsia/Eclampsia) |                         | 1                                                                                                                                                               | 0  | 98 |  |
| 113e.                                                                            | Malpresentation                                                                                     |                         | 1                                                                                                                                                               | 0  | 98 |  |
| 113f.                                                                            | Malposition                                                                                         |                         | 1                                                                                                                                                               | 0  | 98 |  |
| 113g.                                                                            | Prolapsed cord                                                                                      |                         | 1                                                                                                                                                               | 0  | 98 |  |
| 113h.                                                                            | Chorioamnionitis                                                                                    |                         | 1                                                                                                                                                               | 0  | 98 |  |
| 113i.                                                                            | Premature rupture of membrane (PROM)                                                                |                         | 1                                                                                                                                                               | 0  | 98 |  |
| 113j.                                                                            | Pre-term labour                                                                                     |                         | 1                                                                                                                                                               | 0  | 98 |  |
| 113k.                                                                            | Foetal distress in labour                                                                           |                         | 1                                                                                                                                                               | 0  | 98 |  |
| 113l.                                                                            | Foetal death                                                                                        |                         | 1                                                                                                                                                               | 0  | 98 |  |
| 113m.                                                                            | Decreased foetal movement                                                                           |                         | 1                                                                                                                                                               | 0  | 98 |  |
| 113n.                                                                            | Foetal congenital anomaly                                                                           |                         | 1                                                                                                                                                               | 0  | 98 |  |
| 113o.                                                                            | Abdominal pain                                                                                      |                         | 1                                                                                                                                                               | 0  | 98 |  |
| 113p.                                                                            | PV leaking                                                                                          |                         | 1                                                                                                                                                               | 0  | 98 |  |
| 113q.                                                                            | Other (specify):                                                                                    |                         |                                                                                                                                                                 |    |    |  |
| 114.                                                                             | Foetal heart rate at admission                                                                      |                         | Yes, normal (110-160 BPM).....1<br>Yes, abnormal (<110 BPM or >160 BPM).....2<br>Absent.....3<br>Not recorded.....98                                            |    |    |  |
| 115.                                                                             | If foetal heart rate recorded                                                                       | Date (BS)<br>dd/mm/yyyy | <input type="text"/>                                                                                                                                            |    |    |  |
|                                                                                  |                                                                                                     | Time (hh:mm) 24-hr      | <input type="text"/>                                                                                                                                            |    |    |  |
| 116.                                                                             | Stage of labour                                                                                     |                         | Not in labour.....1<br>Latent stage of active labour.....2<br>First stage of active labour.....3<br>Second stage of labour.....4<br>Third stage of labour.....5 |    |    |  |

**PART C: DELIVERY DETAILS**

|      |                                                       |                                                                                                                                                                                                                                                                                    |                                                    |
|------|-------------------------------------------------------|------------------------------------------------------------------------------------------------------------------------------------------------------------------------------------------------------------------------------------------------------------------------------------|----------------------------------------------------|
| 117. | Partograph use                                        | Yes, completely filled..... 1<br>Yes, partially filled..... 2<br>Not filled..... 98                                                                                                                                                                                                |                                                    |
| 118. | Foetal heart rate monitoring recorded during delivery | Yes, as per protocol..... 1<br>Yes, sporadically (> once)..... 2<br>Yes, only once..... 3<br>Not recorded..... 98                                                                                                                                                                  |                                                    |
| 119. | Induction of labour                                   | Induction with prostaglandins..... 1<br>Induction with amniotomy..... 2<br>Induction with oxytocin..... 3<br>No..... 0<br>Not recorded..... 98                                                                                                                                     |                                                    |
| 120. | Received prophylactic antibiotics                     | Yes..... 1<br>No..... 0<br>Not recorded..... 98                                                                                                                                                                                                                                    |                                                    |
| 121. | Mode of delivery                                      | Spontaneous vaginal..... 1<br><i>If vaginal delivery, go to 122</i><br><br>Instrumental..... 2<br><i>If Instrumental delivery, go to 121</i><br><br>Assisted breech delivery..... 3<br><i>Assisted Breech Delivery, go to 122</i><br><br>Emergency CS..... 4<br>Elective CS..... 5 | If<br>Emergency<br>or Elective<br>CS, go to<br>125 |
| 122. | Reason for CS (multiple response)                     | Prolonged labour..... 1<br>Foetal distress..... 2<br>Abnormal lie..... 3<br>Obstetric haemorrhage..... 4<br>Multiple pregnancy..... 5<br>Previous scar..... 6<br>Maternal request..... 7<br>Other (specify).....                                                                   |                                                    |
| 123. | Reason for instrumental delivery                      | Prolonged labour..... 1<br>Foetal distress..... 2<br>Other (specify).....                                                                                                                                                                                                          |                                                    |
| 124. | Mother given Oxytocin (for augmentation of labour)    | Yes..... 1<br>No..... 0<br>Not recorded..... 98                                                                                                                                                                                                                                    |                                                    |
| 125. | Multiple delivery                                     | Yes..... 1<br>No..... 0                                                                                                                                                                                                                                                            |                                                    |

| PART D: NEWBORN DETAILS |                                                   |                                                                                                             |    |                                       |    |
|-------------------------|---------------------------------------------------|-------------------------------------------------------------------------------------------------------------|----|---------------------------------------|----|
| 126.                    | Date of delivery (BS) dd/mm/yyyy                  | <input type="text"/>                                                                                        |    |                                       |    |
| 127.                    | Gestational age by LMP (weeks)                    | <input type="text"/> <input type="text"/> + <input type="text"/><br>Not known..... 0<br>Not recorded.....98 |    |                                       |    |
| 128.                    | Gestational age by ultrasound (weeks)             | <input type="text"/> <input type="text"/> + <input type="text"/><br>Not recorded.....98                     |    |                                       |    |
|                         |                                                   | Single or Twin 1                                                                                            |    | Twin 2                                |    |
| 129.                    | Time of delivery (hh:mm)                          | <input type="text"/>                                                                                        |    | <input type="text"/>                  |    |
| 130.                    | Sex of baby                                       | Girl.....1<br>Boy.....0                                                                                     |    | Girl.....1<br>Boy.....0               |    |
| 131.                    | Birth weight (grams)                              | <input type="text"/>                                                                                        |    | <input type="text"/>                  |    |
| 132.                    | Delivery outcome<br>(If Stillbirth, go to 150)    | Live birth.....1<br>Stillbirth..... 2                                                                       |    | Live birth.....1<br>Stillbirth..... 2 |    |
| 133.                    | APGAR at 1 minute                                 | <input type="text"/>                                                                                        |    | <input type="text"/>                  |    |
| 134.                    | APGAR at 5 minutes                                | <input type="text"/>                                                                                        |    | <input type="text"/>                  |    |
| 135.                    | Malformation recorded                             | Yes.....1<br>No.....0                                                                                       |    | Yes.....1<br>No.....0                 |    |
| 136.                    | Newborn given vitamin K                           | Yes.....1<br>Not recorded.....0                                                                             |    | Yes.....1<br>Not recorded..... 0      |    |
| 137.                    | Newborn body temperature recorded                 | Yes.....1<br>No.....0                                                                                       |    | Yes..... 1<br>No.....0                |    |
| 138.                    | Respiratory rate recorded                         | Yes.....1<br>No.....0                                                                                       |    | Yes.....1<br>No.....0                 |    |
| 139.                    | Medical examination of baby recorded              | Yes.....1<br>No.....0                                                                                       |    | Yes.....1<br>No.....0                 |    |
| 140.                    | Neonatal morbidity recorded<br>(If No, go to 143) | Yes.....1<br>No.....0                                                                                       |    | Yes.....1<br>No.....0                 |    |
| 141.                    | Type of morbidity<br>(multiple response)          | Yes                                                                                                         | No | Yes                                   | No |
|                         | a. Birth asphyxia                                 | 1                                                                                                           | 0  | 1                                     | 0  |
|                         | b. Neonatal encephalopathy                        | 1                                                                                                           | 0  | 1                                     | 0  |
|                         | c. Hyper-bilirubinaemia                           | 1                                                                                                           | 0  | 1                                     | 0  |
|                         | d. Meconium aspiration                            | 1                                                                                                           | 0  | 1                                     | 0  |
|                         | e. Neonatal sepsis                                | 1                                                                                                           | 0  | 1                                     | 0  |
|                         | f. Respiratory distress syndrome                  | 1                                                                                                           | 0  | 1                                     | 0  |
|                         | g. Hypoglycaemia                                  | 1                                                                                                           | 0  | 1                                     | 0  |
|                         | h. Retinopathy of prematurity                     | 1                                                                                                           | 0  | 1                                     | 0  |
| i. Others               | 1                                                 | 0                                                                                                           | 1  | 0                                     |    |

|                  |                                                                             |                                                             |                                                             |     |    |
|------------------|-----------------------------------------------------------------------------|-------------------------------------------------------------|-------------------------------------------------------------|-----|----|
| 142.             | If other cause of morbidity, please specify                                 |                                                             |                                                             |     |    |
| 143.             | Treated for sepsis                                                          | Yes.....1<br>Not recorded .....0                            | Yes.....1<br>Not recorded .....0                            |     |    |
| 144.             | Newborn transferred to other facility ( <b>If Not recorded, go to 146</b> ) | Yes.....1<br>Not recorded .....0                            | Yes.....1<br>Not recorded .....0                            |     |    |
| 145.             | Day of facility transfer (BS)                                               | <input type="text"/>                                        | <input type="text"/>                                        |     |    |
| 146.             | Newborn transferred to another ward ( <b>If No, go to 148</b> )             | Yes, SNCU/NICU.....1<br>Yes, pediatric ward...2<br>No.....0 | Yes, SNCU/NICU.....1<br>Yes, pediatric ward...2<br>No.....0 |     |    |
| 147.             | Day of transfer to ward (BS)                                                | <input type="text"/>                                        | <input type="text"/>                                        |     |    |
| 148.             | Newborns survived first 24 hours ( <b>If No, go to 151</b> )                | Yes.....1<br>No.....0<br>Not known.....9                    | Yes.....1<br>No.....0<br>Not known.....9                    |     |    |
| 149.             | Newborns survived first 7 days ( <b>If No, go to 151</b> )                  | Yes.....1<br>No.....0<br>Not known.....9                    | Yes.....1<br>No.....0<br>Not known.....9                    |     |    |
| 150.             | Newborns alive at discharge ( <b>If Yes, got ot 157</b> )                   | Yes.....1<br>No.....0<br>Not known.....9                    | Yes.....1<br>No.....0<br>Not known.....9                    |     |    |
| 151.             | Date of death (BS) dd/mm/yyyy                                               | <input type="text"/>                                        | <input type="text"/>                                        |     |    |
| 152.             | Time of death (hh:mm)                                                       | <input type="text"/>                                        | <input type="text"/>                                        |     |    |
| 153.             | Perinatal death audit completed ( <b>If No, go to 155</b> )                 | Yes.....1<br>No.....0                                       | Yes.....1<br>No.....0                                       |     |    |
| 154.             | If yes, was it completed within 24 hours?                                   | Yes.....1<br>No.....0<br>Time not recorded...2              | Yes.....1<br>No.....0<br>Time not recorded....2             |     |    |
| 155.             | Cause of death according to journal                                         | Yes                                                         | No                                                          | Yes | No |
|                  | Congenital abnormalities                                                    | 1                                                           | 0                                                           | 1   | 0  |
|                  | Preterm birth                                                               | 1                                                           | 0                                                           | 1   | 0  |
|                  | Birth asphyxia                                                              | 1                                                           | 0                                                           | 1   | 0  |
|                  | Sepsis/pneumonia                                                            | 1                                                           | 0                                                           | 1   | 0  |
|                  | Intrapartum stillbirth                                                      | 1                                                           | 0                                                           | 1   | 0  |
|                  | Antepartum stillbirth                                                       | 1                                                           | 0                                                           | 1   | 0  |
| Others (specify) | 1                                                                           | 0                                                           | 1                                                           | 0   |    |
| 156.             | If other cause of death, please specify                                     | .....<br>.....                                              |                                                             |     |    |
| 157.             | Day of discharge from hospital (BS)                                         | <input type="text"/>                                        | <input type="text"/>                                        |     |    |
