# Supplementary material for: Incidence, risk factors and consequences of preterm birth – findings from a multi-centric observational study for 14 months in Nepal
Source: PubMed Central journal article supplement (PMC7368758; doi:10.1186/s13690-020-00446-7), 2020-07-17
Supplement: 13690_2020_446_MOESM2_ESM.pdf [file 13690_2020_446_MOESM2_ESM.pdf]

## Form 2

# NePeriQIP Client Exit Interview

|                |           |
|----------------|-----------|
| Data Collector | Name..... |
|                | Code..... |

| Data ID                                                       | Information                     | Write or circle where applicable | Notes                |
|---------------------------------------------------------------|---------------------------------|----------------------------------|----------------------|
| <b>PART A: BACKGROUND INFORMATION</b>                         |                                 |                                  |                      |
| 201                                                           | Mother's first name             |                                  |                      |
| 202                                                           | Mother's last name              |                                  |                      |
| 203                                                           | Inpatient number                |                                  |                      |
| 204                                                           | Age of mother (completed years) |                                  |                      |
| 205a                                                          | Caste                           |                                  |                      |
| 205b                                                          | Ethnicity Code                  |                                  |                      |
| 206                                                           | Address                         | District                         |                      |
|                                                               |                                 | Municipality                     |                      |
|                                                               |                                 | Ward                             |                      |
| 207                                                           | Informed consent received?      | Yes ..... 1<br>No ..... 0        |                      |
| <b><i>If no informed consent obtained, stop interview</i></b> |                                 |                                  |                      |
| 208                                                           | Contact number                  | Mobile                           | <input type="text"/> |
|                                                               |                                 | Husband                          | <input type="text"/> |
|                                                               |                                 | Landline                         | <input type="text"/> |
|                                                               |                                 | Others                           | <input type="text"/> |

|                              | Date (BS) (dd/mm/yyyy) | Signature |
|------------------------------|------------------------|-----------|
| Form completed:              |                        |           |
| Data entered into data base: |                        |           |

|                                                                      |                                                                                 |                                                                                                                                  |                  |
|----------------------------------------------------------------------|---------------------------------------------------------------------------------|----------------------------------------------------------------------------------------------------------------------------------|------------------|
| 209                                                                  | What is your education level?                                                   | Illiterate..... 1<br>Able to read and write.....2<br>Complete Primary.....3<br>Completed Secondary.....4<br>Started Higher.....5 |                  |
| 210                                                                  | Do you smoke?                                                                   | Yes ..... 1<br>No ..... 0                                                                                                        | If No, go to 213 |
| 211                                                                  | If yes, how many cigarettes per day?                                            | <input type="text"/> <input type="text"/>                                                                                        |                  |
| 212                                                                  | Do anyone residing in the same house smoke?                                     | Yes ..... 1<br>No ..... 0                                                                                                        |                  |
| <b>What type of fuel does your household mainly use for cooking?</b> |                                                                                 |                                                                                                                                  |                  |
| 213                                                                  | 213a. Electricity                                                               | 1                                                                                                                                | 213d. Biogas 1   |
|                                                                      | 213b. LPG                                                                       | 1                                                                                                                                | 213e. Kerosene 1 |
|                                                                      | 213c. Natural gas                                                               | 1                                                                                                                                | 213f. Wood 1     |
|                                                                      | 213g. No food cooked in household                                               | 1                                                                                                                                |                  |
|                                                                      | 213h. Others (specify)                                                          |                                                                                                                                  |                  |
| 214                                                                  | In this household, what is food cooked on?                                      | Open fire.....1<br>Stove .....2<br>Chulo.....3<br>Other (specify).....                                                           |                  |
| 215                                                                  | Does this (fire/stove/chulo/other) have a chimney, a hood, or neither of these? | Chimney.....1<br>Hood.....2<br>Neither.....3                                                                                     |                  |
| 216                                                                  | Is the cooking usually done in the house, in a separate building, or outdoors?  | In the house.....1<br>Separate building.....2<br>Outdoors.....3<br>Other (specify).....                                          |                  |
| 217                                                                  | Do you have a separate room that is used as a kitchen?                          | Yes.....1<br>No.....0                                                                                                            |                  |
| 218                                                                  | Can you provide monthly family income?                                          | ..... (rupees)                                                                                                                   |                  |

**PART B: OBSTETRIC INFORMATION****Part B1: Previous Obstetric History**

|     |                                                   |                                               |  |
|-----|---------------------------------------------------|-----------------------------------------------|--|
| 219 | Parity                                            | Primipara (no previous children) .....1       |  |
|     |                                                   | Multipara (1-5 previous children)..... 2      |  |
|     |                                                   | Grand multipara (> 5 previous children).... 3 |  |
| 220 | Number of previous pregnancies                    | <input type="text"/> <input type="text"/>     |  |
| 221 | Number of previous abortions<br>(GA <22weeks)     | <input type="text"/> <input type="text"/>     |  |
| 222 | Number of previous C-section                      | <input type="text"/> <input type="text"/>     |  |
| 223 | Number of previous still births<br>(GA ≥22 weeks) | <input type="text"/> <input type="text"/>     |  |
| 224 | Number of previous live births                    | <input type="text"/> <input type="text"/>     |  |
| 225 | Number of previous neonatal deaths                | <input type="text"/> <input type="text"/>     |  |

**Part B2: Current Pregnancy History**

|     |                                                                                     |                                                                                                                                                   |                      |
|-----|-------------------------------------------------------------------------------------|---------------------------------------------------------------------------------------------------------------------------------------------------|----------------------|
| 226 | Antenatal card available                                                            | Yes.....1<br>No.....0                                                                                                                             |                      |
| 227 | Current pregnancy                                                                   | Single.....1<br>Multiple..... 2                                                                                                                   |                      |
| 228 | Was current pregnancy planned? Was it<br>at the right time in life?                 | Yes.....1<br>No.....0                                                                                                                             | If Yes, go<br>to 230 |
| 229 | If Not, did you want to wait until later or<br>did you wish not to become pregnant? | Wait until later..... 1<br>Not become pregnant .....2<br>Don't know .....98                                                                       |                      |
| 230 | ANC check up by doctor/nurse/ANM                                                    | Yes.....1<br>No.....0                                                                                                                             | If No, go to<br>233  |
| 231 | If Yes, how many?                                                                   | <input type="text"/> <input type="text"/>                                                                                                         |                      |
| 232 | Time for first ANC visit                                                            | First trimester (1-3 months pregnant)... .....1<br>Second trimester (4-6 months pregnant)... 2<br>Third trimester (7-9 months pregnant)... .....3 |                      |
| 233 | Delivery preparations                                                               | Yes                                                                                                                                               | No                   |
|     | a. Did you plan where to deliver?                                                   | 1                                                                                                                                                 | 0                    |
|     | b. Did you plan for transport to delivery?                                          | 1                                                                                                                                                 | 0                    |
|     | c. Did you save money for expenses?                                                 | 1                                                                                                                                                 | 0                    |
|     | d. Did you have two blood donors?                                                   | 1                                                                                                                                                 | 0                    |
|     | e. Any other preparations?                                                          | 1                                                                                                                                                 | 0                    |
| 234 | Other preparations, please specify:                                                 |                                                                                                                                                   |                      |

| PART C: DELIVERY |                                                                                                    |                                                                                                                                                                                                   |                         |  |  |  |  |
|------------------|----------------------------------------------------------------------------------------------------|---------------------------------------------------------------------------------------------------------------------------------------------------------------------------------------------------|-------------------------|--|--|--|--|
| 235              | Date of delivery (BS) (dd/mm/yyyy)                                                                 | <table border="1" style="width: 100%; height: 20px;"> <tr> <td style="width: 25%;"></td> <td style="width: 25%;"></td> <td style="width: 25%;"></td> <td style="width: 25%;"></td> </tr> </table> |                         |  |  |  |  |
|                  |                                                                                                    |                                                                                                                                                                                                   |                         |  |  |  |  |
|                  |                                                                                                    | Single or Twin 1                                                                                                                                                                                  | Twin 2                  |  |  |  |  |
| 236              | Sex of babies                                                                                      | Girl.....1<br>Boy.....0                                                                                                                                                                           | Girl.....1<br>Boy.....0 |  |  |  |  |
| 237              | How did you deliver your babies?                                                                   | Spontaneous vaginal..... 1<br>Instrumental delivery.....2<br>Emergency CS.....3<br>Elective CS.....4                                                                                              |                         |  |  |  |  |
| 238              | Did you hear both of your babies cry immediately after birth?                                      | Yes.....1<br>No.....0                                                                                                                                                                             | If Yes, go to 241       |  |  |  |  |
| 239              | Were the babies given any intervention to help the babies cry?                                     | Yes.....1<br>No..... 0<br>Don't know..... 9                                                                                                                                                       | If No, go to 241        |  |  |  |  |
| 240              | If yes, did the health provider explain to you what happened regarding the resuscitation?          | Yes.....1<br>No..... 0<br>Don't know..... 9                                                                                                                                                       |                         |  |  |  |  |
| 241              | Were there any complications while delivering the babies?                                          | Yes.....1<br>No..... 0<br>Don't know..... 9                                                                                                                                                       |                         |  |  |  |  |
| 242              | If Yes, what were the complications?                                                               | ..... (specify)                                                                                                                                                                                   | If No, go to 243        |  |  |  |  |
| 243              | Have you stayed for at least 24 hours after an uncomplicated vaginal birth at the health facility? | Yes.....1<br>No.....0                                                                                                                                                                             |                         |  |  |  |  |
| 244              | Did you have a companion of your choice during labour and child birth?                             | Yes.....1<br>No.....0                                                                                                                                                                             |                         |  |  |  |  |
| 245              | If Yes, who accompanied you?                                                                       | .....                                                                                                                                                                                             |                         |  |  |  |  |

**PART D: ESSENTIAL NEWBORN CARE****Part D1: Nutrition and Breast Feeding**

|     |                                                                                                                                    | Single or Twin 1                                                          | Twin 2                                                                    |
|-----|------------------------------------------------------------------------------------------------------------------------------------|---------------------------------------------------------------------------|---------------------------------------------------------------------------|
| 246 | Were the babies breastfed before transfer to postnatal ward?                                                                       | Yes.....1<br>No.....0<br>Don't know.....9                                 | Yes.....1<br>No.....0<br>Don't know.....9                                 |
| 247 | Did you have any difficulties to start breastfeeding? ( <i>If No, go to 249</i> )                                                  | Yes.....1<br>No.....0                                                     | Yes.....1<br>No.....0                                                     |
| 248 | If Yes, what difficulties?                                                                                                         |                                                                           |                                                                           |
| 249 | Did you receive breastfeeding counselling from a skilled health service provider before discharge?                                 | Yes.....1<br>No.....0                                                     | Yes.....1<br>No.....0                                                     |
| 250 | Did you receive written or verbal information and counselling on exclusive breastfeeding until 6 complete months before discharge? | Yes.....1<br>No.....0                                                     | Yes.....1<br>No.....0                                                     |
| 251 | Did you receive counselling on supplementary feeding after 6 complete months before discharge?                                     | Yes.....1<br>No.....0                                                     | Yes.....1<br>No.....0                                                     |
| 252 | Were the babies been given anything else than breast milk or medicines? ( <i>If No or Don't know, go to 254</i> )                  | Yes.....1<br>No.....0<br>Don't know.....9                                 | Yes.....1<br>No.....0<br>Don't know.....9                                 |
| 253 | If Yes, what was given?                                                                                                            | Formula.....1<br>Water or other fluids..... 2<br>Others<br>(specify)..... | Formula.....1<br>Water or other fluids..... 2<br>Others<br>(specify)..... |
| 254 | Did you receive written or verbal information and counselling on nutrition and how to eat healthy?                                 | Yes.....1<br>No.....0                                                     | Yes.....1<br>No.....0                                                     |

**Part D2: Kangaroo Mother Care (KMC)**

|     |                                                                                           | Single or Twin 1                                                                    | Twin 2                                                                              |
|-----|-------------------------------------------------------------------------------------------|-------------------------------------------------------------------------------------|-------------------------------------------------------------------------------------|
| 255 | Were your babies born before the expected date of delivery or born too soon or too small? | Yes.....1<br>No.....0<br>Don't know.....9                                           | Yes.....1<br>No.....0<br>Don't know.....9                                           |
| 256 | How much did you babies weigh? (grams)                                                    | <input type="text"/> <input type="text"/> <input type="text"/> <input type="text"/> | <input type="text"/> <input type="text"/> <input type="text"/> <input type="text"/> |

**If babies not born too soon or too small or birth weight >2000 grams, go to Part D3!**

|                                                 |                                                                                                                   |                                                                                                                                                             |                                                                                                                                                             |
|-------------------------------------------------|-------------------------------------------------------------------------------------------------------------------|-------------------------------------------------------------------------------------------------------------------------------------------------------------|-------------------------------------------------------------------------------------------------------------------------------------------------------------|
| 257                                             | Did someone counsel you on ways to help your babies because they were born too soon or too small?                 | Yes.....1<br>No.....0<br>Don't know.....9                                                                                                                   |                                                                                                                                                             |
| 258                                             | Did a health worker talk to about Kangaroo Mother Care (KMC)?                                                     | Yes.....1<br>No.....0<br>Don't know.....9                                                                                                                   | If No or Don't know, go to 260                                                                                                                              |
|                                                 |                                                                                                                   | Single or Twin 1                                                                                                                                            | Twin 2                                                                                                                                                      |
| 259                                             | If Yes, did your babies receive KMC? (Probe)                                                                      | Yes.....1<br>No.....0<br>Don't know.....9                                                                                                                   | Yes.....1<br>No.....0<br>Don't know.....9                                                                                                                   |
| <b>Part D3: Hygiene and temperature control</b> |                                                                                                                   |                                                                                                                                                             |                                                                                                                                                             |
| 264                                             | Did you receive written or verbal information and counselling on how to keep the babies warm?                     | Yes.....1<br>No.....0<br>Don't know.....9                                                                                                                   |                                                                                                                                                             |
|                                                 |                                                                                                                   | Single or Twin 1                                                                                                                                            | Twin 2                                                                                                                                                      |
| 260                                             | Have you kept your babies skin-to-skin contact immediately after birth? ( <b>If No or Don't know, go to 262</b> ) | Yes.....1<br>No.....0<br>Don't know.....9                                                                                                                   | Yes.....1<br>No.....0<br>Don't know.....9                                                                                                                   |
| 261                                             | If yes, how long? (hours)                                                                                         | <input type="text"/> <input type="text"/>                                                                                                                   | <input type="text"/> <input type="text"/>                                                                                                                   |
| 262                                             | Were the newborns' body and head covered after birth?                                                             | Yes.....1<br>No.....0<br>Don't know.....9                                                                                                                   | Yes.....1<br>No.....0<br>Don't know.....9                                                                                                                   |
| 263                                             | How were the babies kept warm on the first day of birth?                                                          | Wrapping.....1<br>Skin-to-skin.....2<br>Incubator.....3<br><br>Others (specify).....<br>Don't know.....9                                                    | Wrapping.....1<br>Skin-to-skin.....2<br>Incubator.....3<br><br>Others (specify).....<br>Don't know.....9                                                    |
| 265                                             | How were the babies cleaned on the first day of birth?                                                            | Bathing with cold water...1<br>Bathing with warm water..2<br>Wiping with fabric.....3<br>Not cleaned.....4<br><br>Others (specify).....<br>Don't know.....9 | Bathing with cold water...1<br>Bathing with warm water..2<br>Wiping with fabric.....3<br>Not cleaned.....4<br><br>Others (specify).....<br>Don't know.....9 |
| 266                                             | When were the babies first bathed? (24 hours clock)                                                               | <input type="text"/> <input type="text"/> <input type="text"/> <input type="text"/>                                                                         | <input type="text"/> <input type="text"/> <input type="text"/> <input type="text"/>                                                                         |
| 267                                             | When was the vernix removed after birth? (24 hours clock)                                                         | <input type="text"/> <input type="text"/> <input type="text"/> <input type="text"/>                                                                         | <input type="text"/> <input type="text"/> <input type="text"/> <input type="text"/>                                                                         |

|     |                                                                                       |                                                                                                                    |                                                                                                                    |
|-----|---------------------------------------------------------------------------------------|--------------------------------------------------------------------------------------------------------------------|--------------------------------------------------------------------------------------------------------------------|
| 268 | What was used to cut the umbilical cords?                                             | New razor blade.....1<br>Used razor blade.....2<br>Scissors.....3<br><br>Others (specify).....<br>Don't know.....9 | New razor blade.....1<br>Used razor blade.....2<br>Scissors.....3<br><br>Others (specify).....<br>Don't know.....9 |
| 269 | Have you seen the umbilical stump?                                                    | Yes.....1<br>No.....0<br>Don't know.....9                                                                          | Yes.....1<br>No.....0<br>Don't know.....9                                                                          |
| 270 | Were the umbilical cord stumps covered?                                               | Yes.....1<br>No.....0<br>Don't know.....9                                                                          | Yes.....1<br>No.....0<br>Don't know.....9                                                                          |
| 271 | Was anything applied to the umbilical stumps? <i>(If No or Don't know, go to 275)</i> | Yes.....1<br>No.....0<br>Don't know.....9                                                                          | Yes.....1<br>No.....0<br>Don't know.....9                                                                          |
| 272 | If so, what was applied?                                                              |                                                                                                                    |                                                                                                                    |
| 273 | Was chlorhexidine applied on the stump?                                               | Yes.....1<br>No.....0<br>Don't know.....9                                                                          | Yes.....1<br>No.....0<br>Don't know.....9                                                                          |
| 274 | Who applied it?                                                                       | Myself ....1<br>Health worker.....2<br>Family member.....3<br>Others.....                                          | Myself ....1<br>Health worker.....2<br>Family member.....3<br>Others.....                                          |
| 275 | Did you receive counselling on cord care?                                             | Yes.....1<br>No.....0                                                                                              | Yes.....1<br>No.....0                                                                                              |
| 276 | Did you receive counselling on how to maintain hygiene (clean) of mother and babies?  | Yes.....1<br>No.....0                                                                                              | Yes.....1<br>No.....0                                                                                              |

| Part D4: Danger signs |                                                                                                        |                                            |                         |  |                      |
|-----------------------|--------------------------------------------------------------------------------------------------------|--------------------------------------------|-------------------------|--|----------------------|
| 277                   | Did the health worker counsel you on danger signs of mother during delivery and postnatal period?      | Yes.....1<br>No.....0<br>Don't know..... 9 |                         |  | If Don't know, probe |
| 278                   | If Yes, what maternal danger signs did they counsel about? (multiple response)                         | Spontaneously mentioned                    | Mentioned after probing |  |                      |
|                       | a. Fever                                                                                               | 1                                          | 1                       |  |                      |
|                       | b. Bleeding                                                                                            | 1                                          | 1                       |  |                      |
|                       | c. Headache                                                                                            | 1                                          | 1                       |  |                      |
|                       | d. Unconsciousness                                                                                     | 1                                          | 1                       |  |                      |
|                       | e. Swelling                                                                                            | 1                                          | 1                       |  |                      |
|                       | f. Abdominal pain                                                                                      | 1                                          | 1                       |  |                      |
|                       | g. Foul smelling discharge                                                                             | 1                                          | 1                       |  |                      |
|                       | h. Others (specify                                                                                     |                                            |                         |  |                      |
| 279                   | Did the health workers counsel you on danger signs of the babies during delivery and postnatal period? | Yes.....1<br>No.....0<br>Don't know..... 9 |                         |  | If Don't know, probe |
| 280                   | If Yes, what newborn danger signs did they counsel about? (multiple response)                          | Spontaneously mentioned                    | Mentioned after probing |  |                      |
|                       | a. Fever                                                                                               | 1                                          | 1                       |  |                      |
|                       | b. Unable to breastfeed                                                                                | 1                                          | 1                       |  |                      |
|                       | c. Fast breathing                                                                                      | 1                                          | 1                       |  |                      |
|                       | d. Chest in drawing                                                                                    | 1                                          | 1                       |  |                      |
|                       | e. Umbilical infection                                                                                 | 1                                          | 1                       |  |                      |
|                       | f. Lethargy or unconscious                                                                             | 1                                          | 1                       |  |                      |
|                       | g. Vomiting                                                                                            | 1                                          | 1                       |  |                      |
|                       | h. Hypothermia                                                                                         | 1                                          | 1                       |  |                      |
|                       |                                                                                                        | i. Others (specify)                        |                         |  |                      |

| PART E: DISCHARGE |                                                                                                                                               |                                                                                                            |    |                                |
|-------------------|-----------------------------------------------------------------------------------------------------------------------------------------------|------------------------------------------------------------------------------------------------------------|----|--------------------------------|
| 281               | Did a medical doctor examine your baby when you were present?                                                                                 | Yes.....1<br>No.....0<br>Don't know..... 9                                                                 |    |                                |
| 282               | Did a health worker examine your baby before discharge?                                                                                       | Yes.....1<br>No.....0<br>Don't know..... 9                                                                 |    |                                |
| 283               | Before discharge, did you receive counselling on:                                                                                             | Yes                                                                                                        | No |                                |
|                   | a. the care of the baby?                                                                                                                      | 1                                                                                                          | 0  |                                |
|                   | b. playing with baby?                                                                                                                         | 1                                                                                                          | 0  |                                |
|                   | c. birth spacing and family planning?                                                                                                         | 1                                                                                                          | 0  |                                |
|                   | d. immunization schedule for the baby?                                                                                                        | 1                                                                                                          | 0  |                                |
|                   | e. registering the birth of the baby?                                                                                                         | 1                                                                                                          | 0  |                                |
| 284               | Were you given the opportunity to discuss any concerns and preferences?                                                                       | Yes.....1<br>No.....0                                                                                      |    |                                |
| 285               | Were you adequately informed by the care provider about examinations, actions and decisions taken for your care throughout the hospital stay? | Yes.....1<br>No.....0                                                                                      |    |                                |
| 286               | Are you satisfied with the health education and information you received from health care providers?                                          | Very satisfied.....5<br>Satisfied..... 4<br>Neither.....3<br>Dissatisfied.....2<br>Very dissatisfied.....1 |    |                                |
| 287               | Are you satisfied with the degree of privacy during your stay in labour and child birth areas?                                                | Very satisfied.....5<br>Satisfied..... 4<br>Neither.....3<br>Dissatisfied.....2<br>Very dissatisfied.....1 |    |                                |
| 288               | Were you treated with respect and was your dignity preserved during your stay at the hospital?                                                | Yes.....1<br>No.....0                                                                                      |    |                                |
| 289               | Did the health service meet your religious and cultural birthing practice needs?                                                              | Yes.....1<br>No.....0                                                                                      |    |                                |
| 290               | Were you or your newborn physically, verbally or sexually abused during labour or childbirth or after birth? Were you treated in a bad way?   | Yes.....1<br>No.....0                                                                                      |    | If No or Don't know, go to 292 |

|       |                                                                                      |                                                                                                                                                           |                                                    |
|-------|--------------------------------------------------------------------------------------|-----------------------------------------------------------------------------------------------------------------------------------------------------------|----------------------------------------------------|
| 291   | If Yes, what exactly happened?<br>(allow multiple responses)                         | Pinched.....1<br>Slapped.....2<br>Beaten.....3<br>Episiotomy without anaesthesia.....4<br>Tied to bed.....5<br>Verbally scolded.....6<br><br>Other (..... |                                                    |
| 292   | Were you refused care because of inability to pay?                                   | Yes.....1<br>No.....0<br>Don't know.....9                                                                                                                 |                                                    |
| 293   | Were you asked by the health workers for extra money while at the hospital?          | Yes.....1<br>No.....0<br>Don't know.....9                                                                                                                 |                                                    |
| 294   | <b>How much did you pay for the services you received?</b>                           |                                                                                                                                                           |                                                    |
| 294a. | Admission charge                                                                     | .....(in rupees)                                                                                                                                          | If no fees were paid for the services, go to 295   |
| 294b. | Bed charge                                                                           | .....(in rupees)                                                                                                                                          |                                                    |
| 294c. | Laboratory diagnosis                                                                 | .....(in rupees)                                                                                                                                          |                                                    |
| 294d. | Doctor fees                                                                          | .....(in rupees)                                                                                                                                          |                                                    |
| 294e. | Medicines                                                                            | .....(in rupees)                                                                                                                                          |                                                    |
| 294f. | Others.....                                                                          | .....(in rupees)                                                                                                                                          |                                                    |
| 294h. | Others.....                                                                          | .....(in rupees)                                                                                                                                          |                                                    |
| 295   | <b>What were the additional expense you or your family had to bear for delivery?</b> |                                                                                                                                                           |                                                    |
| 295a. | Transportation                                                                       | .....(in rupees)                                                                                                                                          | If no any additional expenses were paid, go to 296 |
| 295b. | Lodging                                                                              | .....(in rupees)                                                                                                                                          |                                                    |
| 295c. | Food                                                                                 | .....(in rupees)                                                                                                                                          |                                                    |
| 295d. | Others.....                                                                          | .....(in rupees)                                                                                                                                          |                                                    |
| 296   | Do you know about the 'Aama Karyakram' or free maternity incentive scheme?           | Yes.....1<br>No.....0                                                                                                                                     |                                                    |
| 297   | Did you receive transportation incentive?                                            | Yes.....1<br>No.....0<br>Don't know.....9                                                                                                                 |                                                    |
| 298   | Overall, how satisfied are you with the services?                                    | Very satisfied.....5<br>Satisfied.....4<br>Neither.....3<br>Dissatisfied.....2<br>Very dissatisfied.....1                                                 |                                                    |
| 299   | Would you recommend a friend to deliver at this hospital?                            | Yes.....1<br>No.....0<br>Don't know.....9                                                                                                                 |                                                    |
